# Supplementary material
Source: PubMed Central journal article supplement (PMC5074052)
Supplement: NIHMS822218-supplement-Supporting_Information.pdf [file NIHMS822218-supplement-Supporting_Information.pdf]

## Supporting Information

### ***Characterization of methanobactin from *Methylosinus* sp. LW4***

Grace E. Kenney, Anthony W. Goering, Matthew O. Ross, Caroline J. DeHart, Paul M. Thomas, Brian M. Hoffman, Neil L. Kelleher, Amy C. Rosenzweig\*

Departments of Molecular Biosciences and of Chemistry, Northwestern University, Evanston, Illinois 60208, United States

\*[amyr@northwestern.edu](mailto:amyr@northwestern.edu)

## TABLE OF CONTENTS

|                                                                                       |     |
|---------------------------------------------------------------------------------------|-----|
| Supplemental materials and methods                                                    | S3  |
| Figure S1. Structures of characterized Mbns                                           | S6  |
| Figure S2. Predicted structures of Mbns from various families                         | S7  |
| Figure S3. Tandem MS analysis of LW4 CuMbn                                            | S8  |
| Figure S4. Correlations from individual 2D NMR experiments                            | S9  |
| Figure S5. Acid hydrolysis of LW4 Mbn                                                 | S11 |
| Figure S6. Electron density from <i>Mc. sp. M</i> Mbn prompts heterocycle re-analysis | S12 |
| Figure S7. ESI-LC-MS of LW4 Mbn exposed to 100 mM HCl                                 | S13 |
| Table S1. NMR spectroscopic data for LW4 CuMbn                                        | S14 |
| NMR Spectra                                                                           |     |
| <sup>1</sup> H in 10% D <sub>2</sub> O                                                | S16 |
| [ <sup>1</sup> H- <sup>1</sup> H]-TOCSY in 10% D <sub>2</sub> O                       | S17 |
| [ <sup>1</sup> H- <sup>13</sup> C]-HMBC in 10% D <sub>2</sub> O                       | S18 |
| [ <sup>1</sup> H- <sup>1</sup> H]-ROESY in 10% D <sub>2</sub> O                       | S19 |
| [ <sup>1</sup> H- <sup>13</sup> C]-HSQC in 10% D <sub>2</sub> O                       | S20 |
| [ <sup>1</sup> H- <sup>15</sup> N]-HSQC in 10% D <sub>2</sub> O                       | S21 |
| <sup>1</sup> H in 100% D <sub>2</sub> O                                               | S22 |
| [ <sup>1</sup> H- <sup>1</sup> H]-TOCSY in 100% D <sub>2</sub> O                      | S23 |
| [ <sup>1</sup> H- <sup>13</sup> C]-HMBC in 100% D <sub>2</sub> O                      | S24 |
| [ <sup>1</sup> H- <sup>1</sup> H]-ROESY in 100% D <sub>2</sub> O                      | S25 |
| [ <sup>1</sup> H- <sup>13</sup> C]-HSQC in 100% D <sub>2</sub> O                      | S26 |
| Supplemental references                                                               | S27 |

## Supplementary Methods

### ***Ms. sp. LW4 Mbn production and purification***

*Ms. sp. LW4* was grown in a 12 L fermenter in medium containing 0.1  $\mu\text{M}$   $\text{CuSO}_4$  but otherwise grown and harvested as previously described for *Ms. trichosporium* OB3b;<sup>1</sup> no isotopic supplementation was performed for Mbn used in NMR experiments. Spent medium was clarified using a Centramate PE tangential flow filtration system equipped with a 100 kDa Omega cassette (Pall) and loaded onto a 1 in x 30 in Diaion HP-20 column. *Ms. sp. LW4* Mbn was eluted with 60% MeOH/40% 10mM  $\text{NH}_4\text{OAc}$  and either lyophilized immediately (apo Mbn) or stabilized with near equimolar levels of copper and then lyophilized (CuMbn).

*Ms. sp. LW4* (Cu)Mbn was further purified on an Agilent 1100 series HPLC system equipped with a photodiode array detector, using a 30-min gradient at 1 mL/min of 10-50% Solvent B (80% HPLC-grade acetonitrile (Sigma) and 20% 10 mM  $\text{NH}_4\text{OAc}$ ) against Solvent A (10 mM  $\text{NH}_4\text{OAc}$  pH 6.0) on a Grace Vydac analytical column (218TP54 300 $\text{\AA}$  5  $\mu\text{m}$ , 4.6 mm i.d. x 250 mm) or preparative column (218TP1022 300 $\text{\AA}$  5  $\mu\text{m}$ , 22 mm i.d. x 250 mm, runtimes adjusted for the increased column diameter and a 5mL/min flow rate).

### **UV-visible spectrophotometry**

Spectra were collected on an Agilent 8453 spectrophotometer equipped with a Peltier temperature controller. For *Ms. sp. LW4* Mbn degradation, 100 mM HCl (final) was added to 250  $\mu\text{L}$  Mbn in a quartz cuvette, and complete spectra were collected over a 4-day period, beginning with spectrum acquisition every 15 s with intervals between acquisitions increasing by 1% each round. The resulting data were analyzed using Igor Pro 6.1 (Wavemetrics).

### **Inductively coupled plasma mass spectrometry**

Samples were prepared in 3% trace metal grade nitric acid (Sigma-Aldrich). Samples were run on a Thermo iCap Qc ICP-MS in the Northwestern Quantitative Bio-Element Imaging Center (QBIC), and calibrated against a standard curve of .1-200ppb multi-element standards (Inorganic Ventures). Three survey scans were performed for each run, and the average intensity was used to calculate the total amount of a given metal isotope.

### **Electron paramagnetic resonance (EPR) spectroscopy**

EPR samples were analyzed in quartz Wilmad EPR tubes via X-band continuous wave (CW) EPR on a Bruker ESP-300 spectrometer, utilizing an Oxford Instruments ESR-900 helium flow cryostat at 20 K. All spectra were collected under the following conditions: microwave frequency 9.36-9.37GHz, power attenuation 35 dB, 160 ms time constant, 16 G modulation amplitude. Background corrected spectra were double integrated in LabCalc over identical field range, and total  $\text{Cu}^{2+}$  spin concentration of Mbn samples was correlated to a standard curve of known concentration  $\text{CuSO}_4$  standards in 10 mM ammonium acetate, pH 6.5 (500  $\mu\text{M}$ , 250  $\mu\text{M}$ , 125  $\mu\text{M}$ , 62.5  $\mu\text{M}$ , and 31.25  $\mu\text{M}$   $\text{CuSO}_4$ ),  $R^2 = 0.975$ . Since intact CuMbn exhibited no signal, spin quantitation was not performed for this sample. *Ms. sp. LW4* CuMbn samples were digested in 10% trace metal grade nitric acid for 1 h at 100  $^\circ\text{C}$  and were then re-analyzed via EPR, with the nitric acid-derived dilution factors taken into account. After analysis, metal content was confirmed via ICP-MS.

## Electrospray mass spectrometry and tandem MS

Following resuspension, *Ms. sp. LW4 CuMbn* extracts were analyzed by HR-LC-MS on an Agilent 1100 HPLC stack paired with a Thermo Q-exactive mass spectrometer in the Kelleher laboratory. The LC method was run with the flow rate of 200  $\mu\text{L}/\text{min}$  for 70 min. The compound was resolved using a 35 min gradient from 2-60% solvent B (0.1% formic acid in acetonitrile) against solvent A (0.1% formic acid in water), followed by a 19 min, gradient of 60-98% B.

The MS method was also 70 min, run in positive mode, with a scan window from  $m/z$  250-3750 with 35,000 resolution. After each full scan, a data dependent  $\text{MS}^2$  cycle was initiated to acquire fragmentation spectra from the top 5 most intense ions present in the  $\text{MS}_1$  spectrum.  $\text{MS}_2$  spectra were acquired with a dynamic scan range; fragmentation was induced by higher energy collisional dissociation with normalized collisional energy value of 25. A dynamic exclusion list was used to prevent the re-fragmentation of the same ion species for a period of 20 s.

HCl-degraded *Ms. sp. LW4 Mbn* was analyzed at the Northwestern Integrated Molecular Structure Education and Research Center (IMSERC) via LC-MS on an Agilent 1100 HPLC stack with inline DAD paired with a Bruker AmazonX ion trap mass spectrometer, using electrospray injection. Samples were introduced via injection onto a Supelcosil LC-18-DB column (4.6mm x 3.3 cm, 3 $\mu$ ) and analyzed over a gradient of 5-55% B (80% ACN, 20% 10mM  $\text{NH}_4\text{OAc}$ ) against A (10mM  $\text{NH}_4\text{OAc}$ ) at .5mL/min. Masses were acquired between 100 and 2000 Da and analyzed using both positive and negative ion modes.

## NMR techniques

Lyophilized *Ms. sp. LW4 CuMbn* was resuspended in 10 mM sodium phosphate pH 6.5 at either 10% or 100%  $\text{D}_2\text{O}$ , for a final Mbn concentration of 1-5 mM. All experiments were performed at 25  $^\circ\text{C}$  on a 600 MHz Agilent DD2 instrument equipped with a z-gradient triple resonance (HCN) COLD probe in IMSERC at Northwestern.

In 10%  $\text{D}_2\text{O}$  samples, solvent suppression with excitation sculpting (ES) was used for 1D and homonuclear experiments, namely  $^1\text{H}$  [ $^1\text{H}$ - $^1\text{H}$ ]-TOCSY and [ $^1\text{H}$ - $^1\text{H}$ ]-ROESY experiments; TOCSY and ROESY experiments used mixing times of 80 and 150 ms respectively, 150 ms acquisition time, a spectral width of 12ppm, 128 increments in  $t_1$  and 1077/1258 complex points in  $t_2$  respectively. For each  $t_1$  value, 16 transients were averaged. Presaturation solvent suppression was used in [ $^1\text{H}$ - $^{13}\text{C}$ ]-HMBC and [ $^1\text{H}$ - $^{13}\text{C}$ ]-HSQC experiments. Proton/carbon heteronuclear two-dimensional experiments used a mixing time of 150 ms, a proton spectral width of 14 ppm, a carbon spectral width of 190 ppm, 128 increments in  $t_1$ , and 32 transients with 1258 complex data points in  $t_2$ .  $^1\text{H}$  and  $^{13}\text{C}$  chemical shifts were referenced to residual solvent signals. [ $^1\text{H}$ - $^{15}\text{N}$ ]-HSQC experiments used a proton spectral width of 4 ppm, 96 transients, and 599 complex points; the water flip-back approach was used to address solvent signal.

Samples resuspended in 100%  $\text{D}_2\text{O}$  were analyzed under similar conditions, with the following differences. [ $^1\text{H}$ - $^1\text{H}$ ]-TOCSY used 200  $t_1$  increments, 300 ms acquisition time and 2155 complex data points. [ $^1\text{H}$ - $^1\text{H}$ ]-ROESY also used 200  $t_1$  increments and 992 complex points in  $t_2$ . Both

carbon-proton heteronuclear experiments used a proton spectral width of 11 ppm and a carbon spectral width of 200 ppm, 200  $t_1$  increments, and 992 complex points. [ $^1\text{H}$ - $^{13}\text{C}$ ]-HSQC used 8 transients, while [ $^1\text{H}$ - $^{13}\text{C}$ ]-HMBC involved averaging over 32 transients. No [ $^1\text{H}$ - $^{15}\text{N}$ ]-HSQC experiments were performed in 100%  $\text{D}_2\text{O}$ .

The spectra from these experiments were processed using either MestReNova 9.1.0 or ACD/Spectrus 2015. All  $^1\text{H}$ ,  $^{13}\text{C}$ , and  $^{15}\text{N}$  assignments are provided in Table S1. Figure S3 shows correlation results from individual 2D NMR experiments, and spectra from all individual experiments are available at the end of this document.

## Supplementary figures

**Figure S1.** The published structures of the six structurally characterized CuMbns. The structures of CuMbns from *Mc. hirsuta* CSC1, *Mc. rosea* SV97, and *Mc. sp. M* were determined via X-ray crystallography; the structures of CuMbns from *Mc. sp. SB2* and *Ms. sp. LW4* were determined via NMR (the latter as described in this manuscript); the structure of CuMbn from *Ms. trichosporium* OB3b was initially determined via X-ray crystallography and was updated after analysis of NMR data. Caveats regarding the identification of *Mc.* Mbn heterocycles are discussed in the manuscript. Light gray structural components represent residues that are sometimes lost in the natural product as isolated from spent medium; based on genomic information, there are additional C-terminal residues that are frequently lost in *Mc.* Mbns. In all but *Mc. sp. M*, the residues following the sole oxazolone/thioamide moiety are AATNG, and though no genomic information is available for *Mc. sp. M*, homology to other Mbns suggests the corresponding five residues in that Mbn are AMTNG.

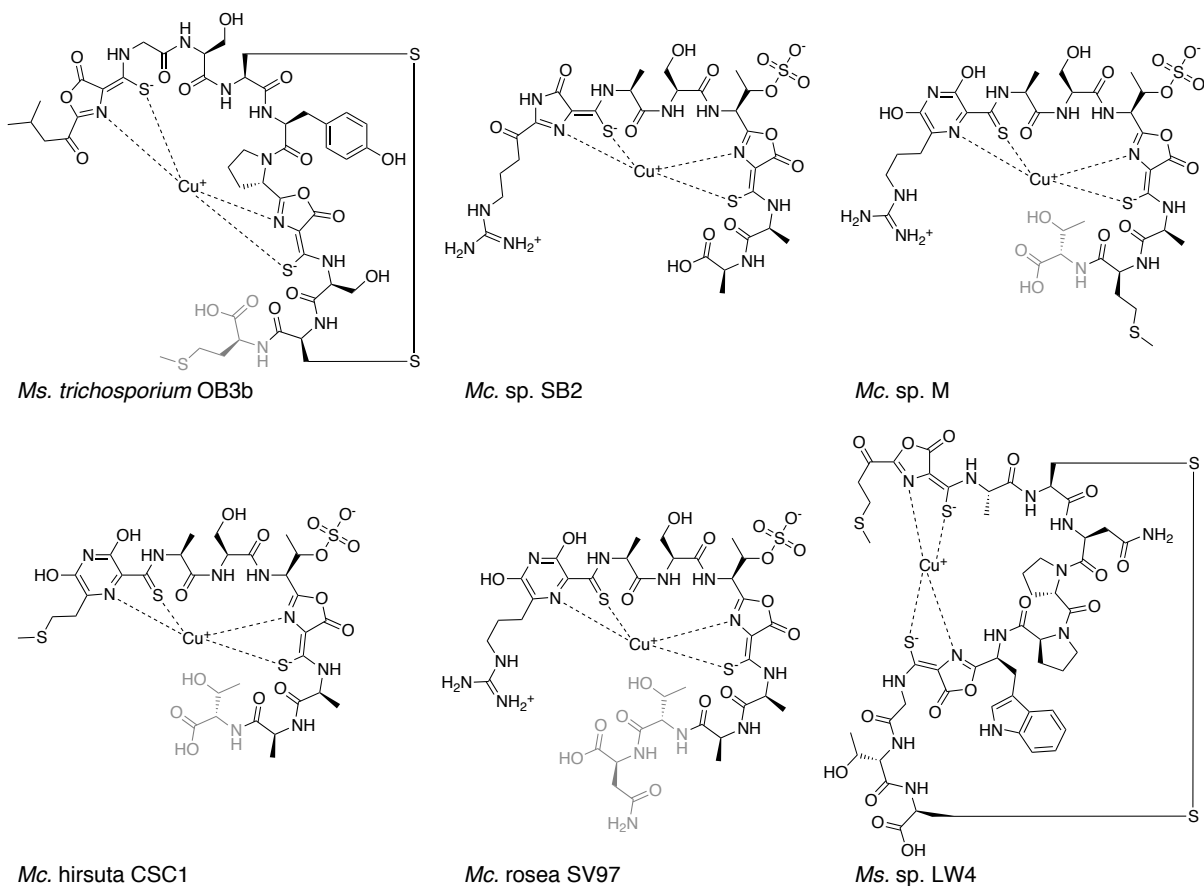



**Figure S3.** Fourier-transform tandem MS of *Ms. sp. LW4 CuMbn*. (A) Tryptophan low mass indicator ions are observed, consistent with the presence of a tryptophan residue in the *Ms. sp. LW4 CuMbn* backbone. (B) Proline and diproline low mass indicator ions are also observed, again consistent with the diproline moiety predicted to be present in *Ms. sp. LW4 CuMbn*.

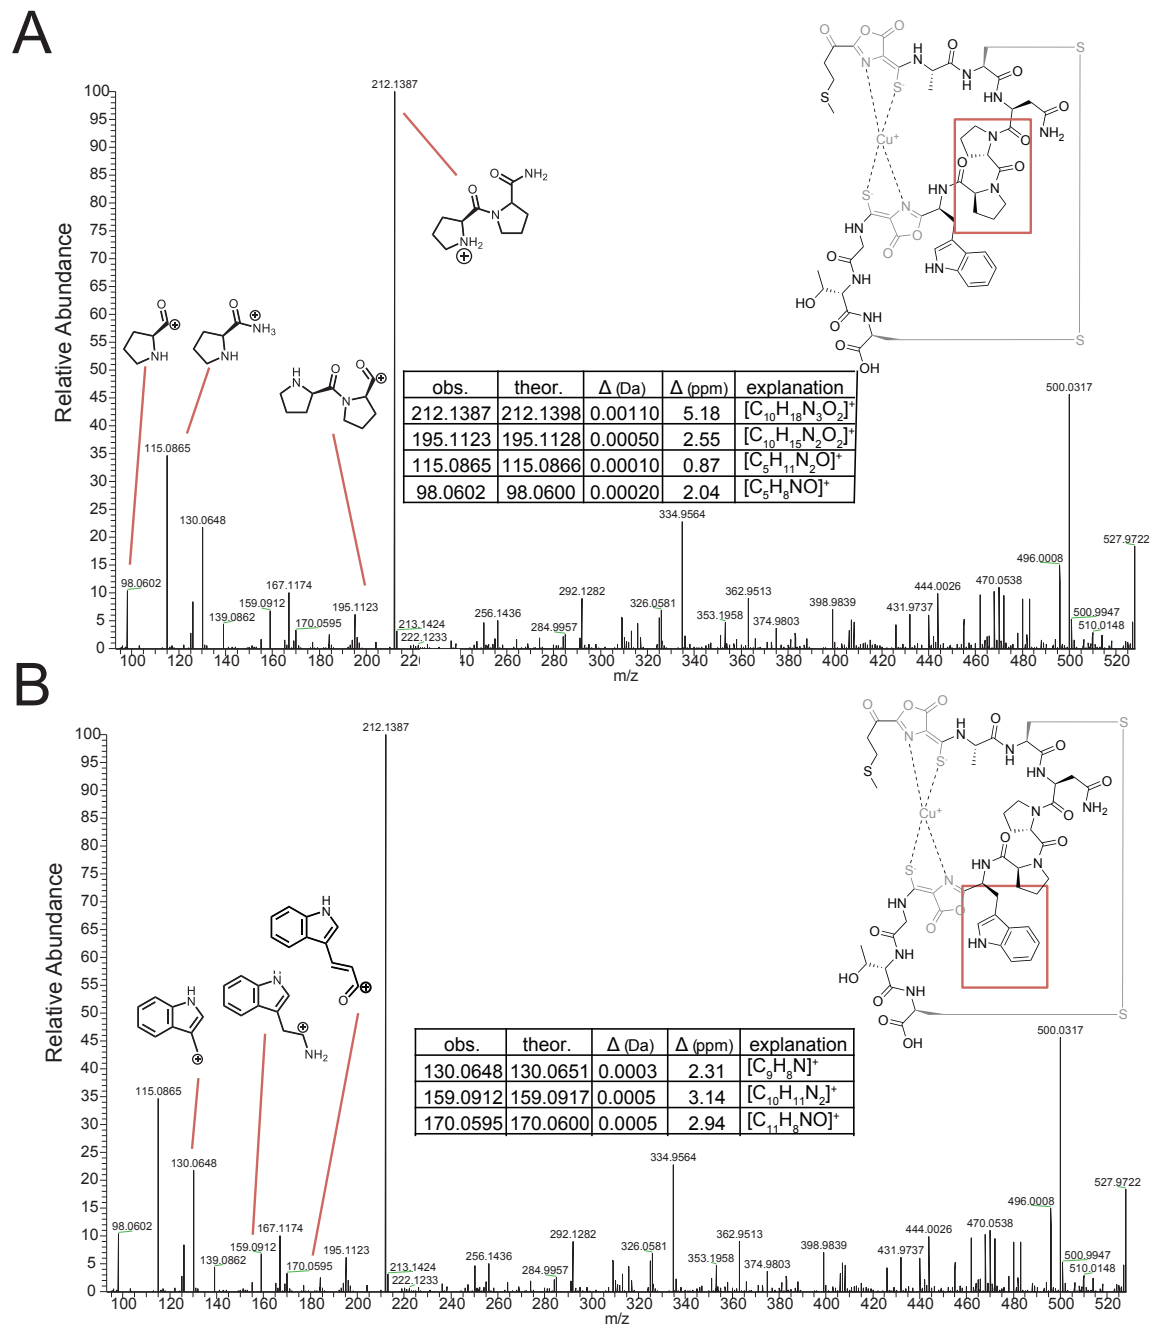



**Figure S4.** Correlations from individual 2D NMR experiments. (A) [ $^1\text{H}$ - $^1\text{H}$ ]-TOCSY connectivity in 100%  $\text{D}_2\text{O}$ , depicted via blue arrows. (B) [ $^1\text{H}$ - $^{13}\text{C}$ ]-HMBC in 100%  $\text{D}_2\text{O}$ , depicted by directional green arrows. (C) [ $^1\text{H}$ - $^1\text{H}$ ]-ROESY in 100%  $\text{D}_2\text{O}$ , inter-residue NOEs depicted via purple arrows. (D) [ $^1\text{H}$ - $^{13}\text{C}$ ]-HSQC in 100%  $\text{D}_2\text{O}$ , CH bonds indicated by yellow circles. (E) [ $^1\text{H}$ - $^1\text{H}$ ]-TOCSY in 10%  $\text{D}_2\text{O}$ . (F) [ $^1\text{H}$ - $^{13}\text{C}$ ]-HMBC in 10%  $\text{D}_2\text{O}$ , proton-carbon connectivity depicted by directional green arrows. (G) [ $^1\text{H}$ - $^1\text{H}$ ]-ROESY in 10%  $\text{D}_2\text{O}$ , inter-residue NOEs depicted via purple arrows. (H) [ $^1\text{H}$ - $^{13}\text{C}$ ]-HSQC in 10%  $\text{D}_2\text{O}$ , CH pairs indicated by yellow circles. (I) [ $^1\text{H}$ - $^{15}\text{N}$ ]-HSQC in 10%  $\text{D}_2\text{O}$ , NH pairs in red.

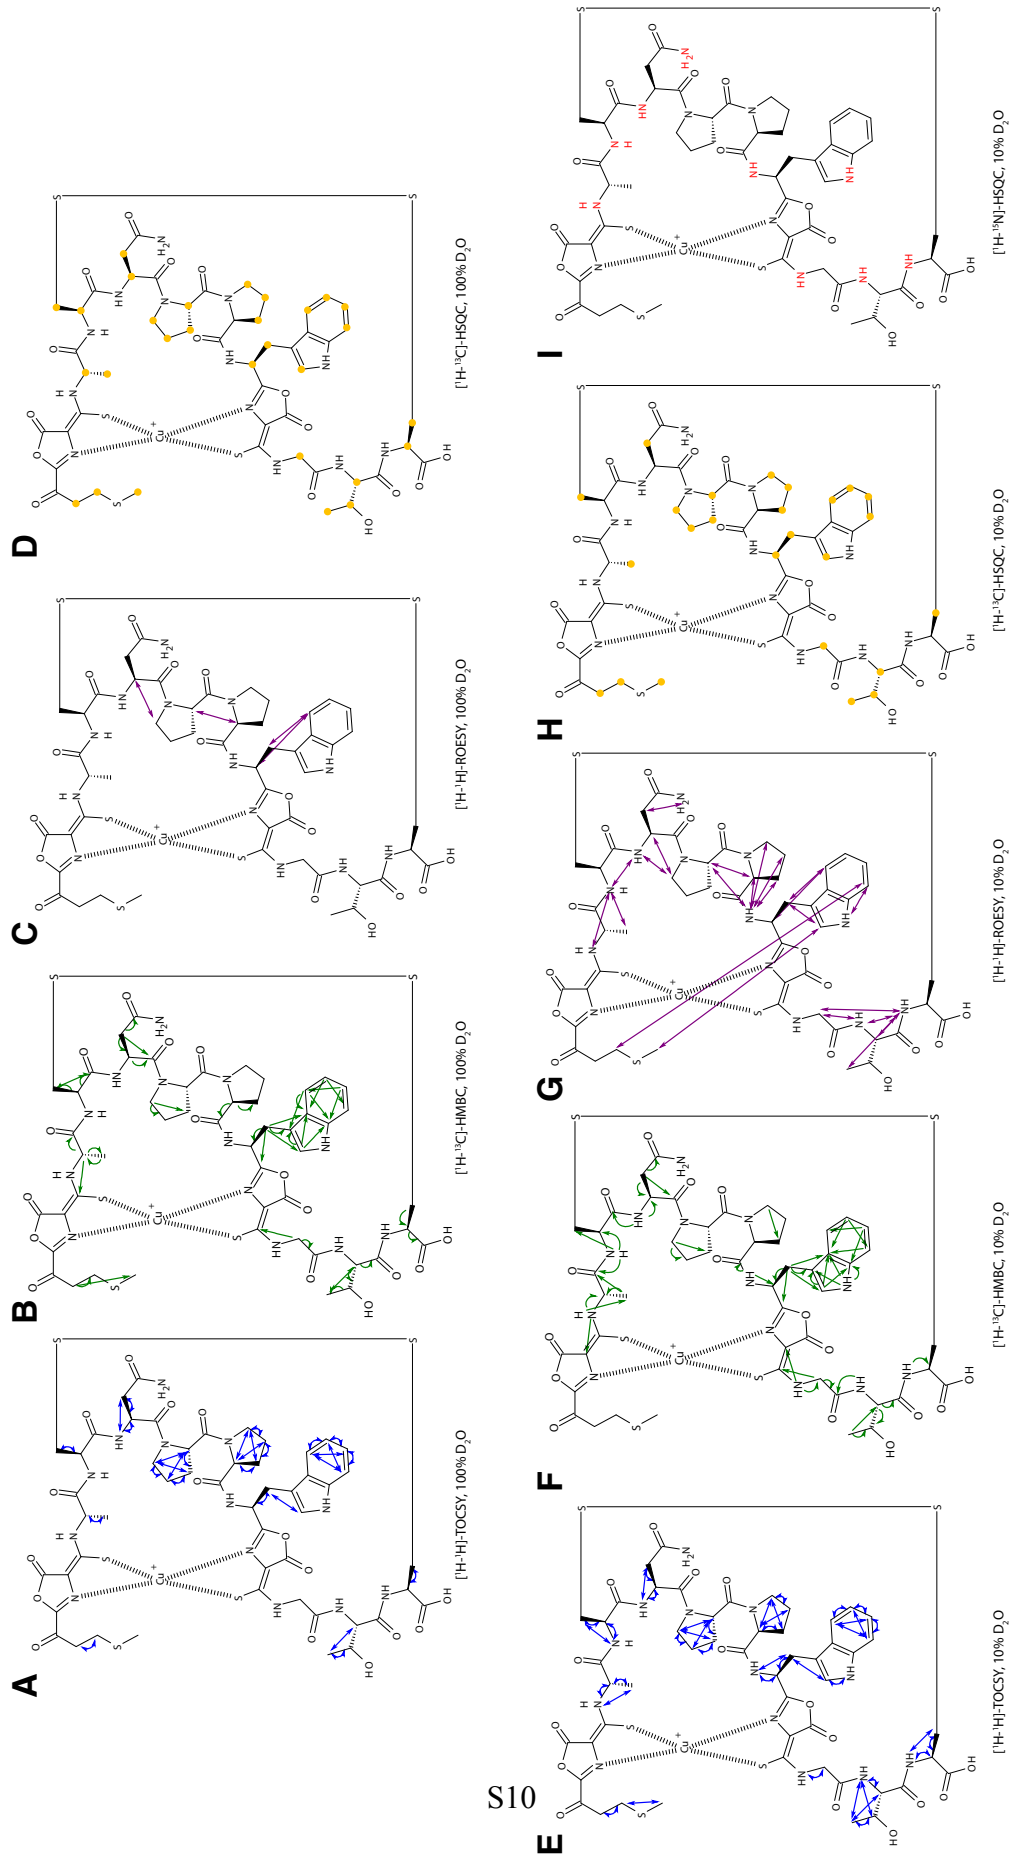

**Figure S5.** Acid hydrolysis of *Ms. sp.* LW4 Mbn. (A) UV-vis spectra of the compound taken at 10 ks intervals over a 96 h period after addition of 100 mM HCl. Due to a drop during the initial 10 ks, there is no true isosbestic point observed during this process, although absorbance appears to change the least at 277 nm; this is similar to what has been observed for *Ms. trichosporium* OB3b Mbn. (B) Hydrolytic degradation pathway of *Ms. sp.* LW4 Mbn.

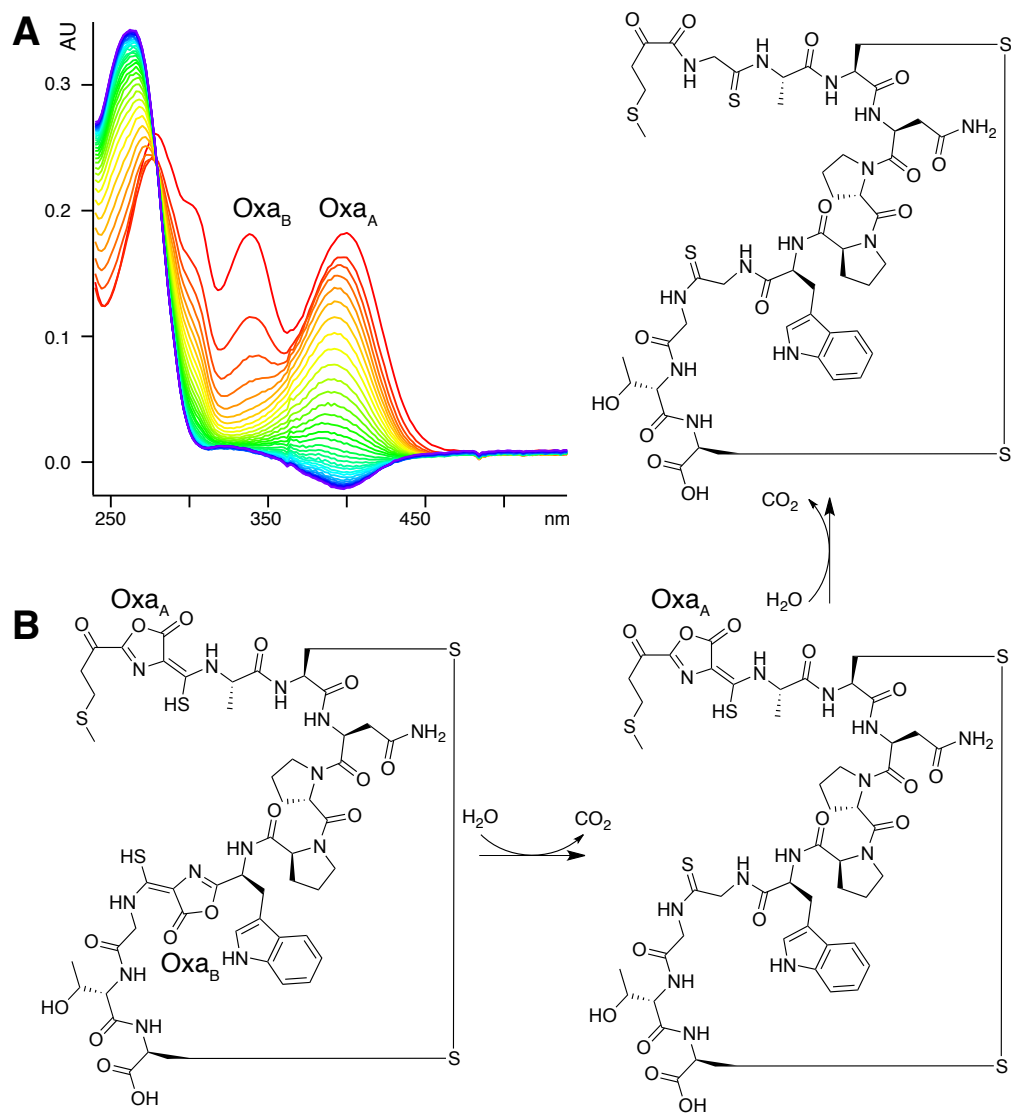

**Figure S6.** (A) Imidazolone moiety present in the published NMR-derived *Mc. sp. SB2* CuMbn structure. (B) Pyrazinedione moiety present in the other three published *Mc. CuMbn* structures, as determined via X-ray crystallography. (C) A hydroxy-oxo tautomer of the pyrazinedione moiety, which would exhibit 2D NMR connectivity similar to that observed for the *Mc. sp. SB2* compound, including the presence of an additional secondary amine group. (D)  $2F_o - F_c$  electron density map of *Mc. sp. M* CuMbn showing the amino terminal 3-guanidinopropane-pyrazinedione group (PDB code 2YGJ, calculated using the Electron Density Server (eds.bmc.uu.se) contoured at  $0.7\sigma$  (gray) and  $3\sigma$  (blue)). Extra density consistent with protonation is indicated with black arrows, and is similar in magnitude and shape to that observed for the protons on the propane chain (blue arrows).

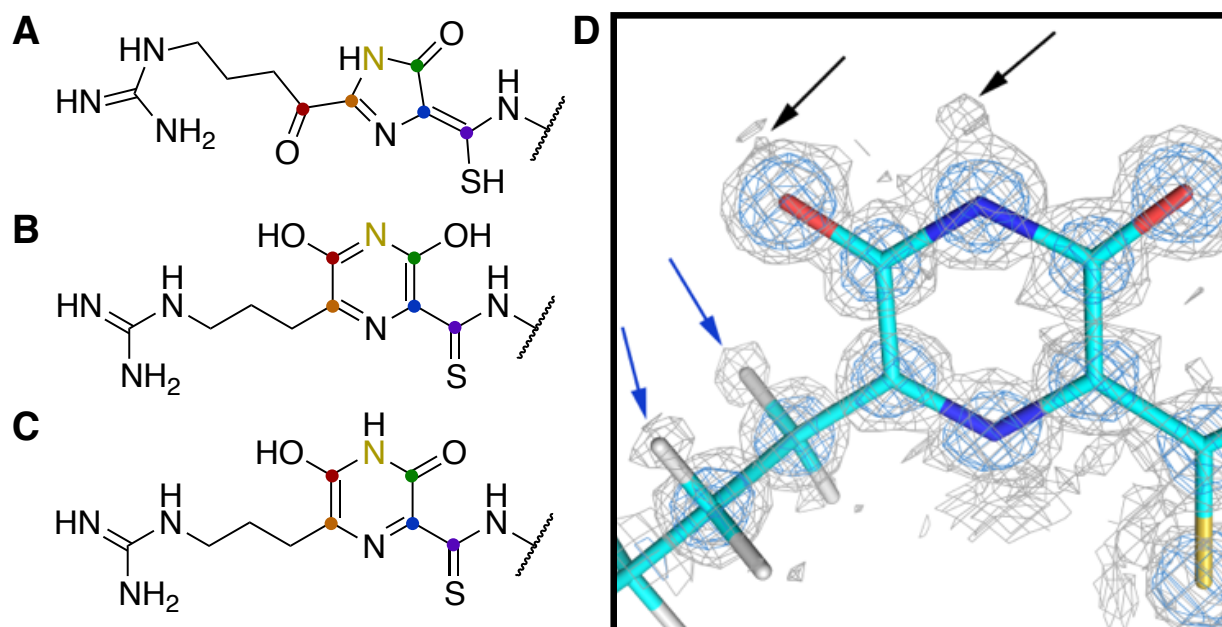

**Figure S7.** ESI LC-MS analysis of *Ms. sp.* LW4 Mbn after acid hydrolysis at 4 h (A) and 4 d (B). As with Mbn from *Ms. trichosporium* OB3b, hydrolysis of the *Ms. sp.* LW4 heterocycles results in a mass decrease of 26 Da, consistent with a combined hydrolysis/decarboxylation step that yields thioamide-adjacent glycines in the place of the oxazolone rings. Evidence for two consecutive hydrolysis/decarboxylation steps can be found given the presence of two degradation products at earlier timepoints, with the mass shifting towards the fully lysed compound at later timepoints.

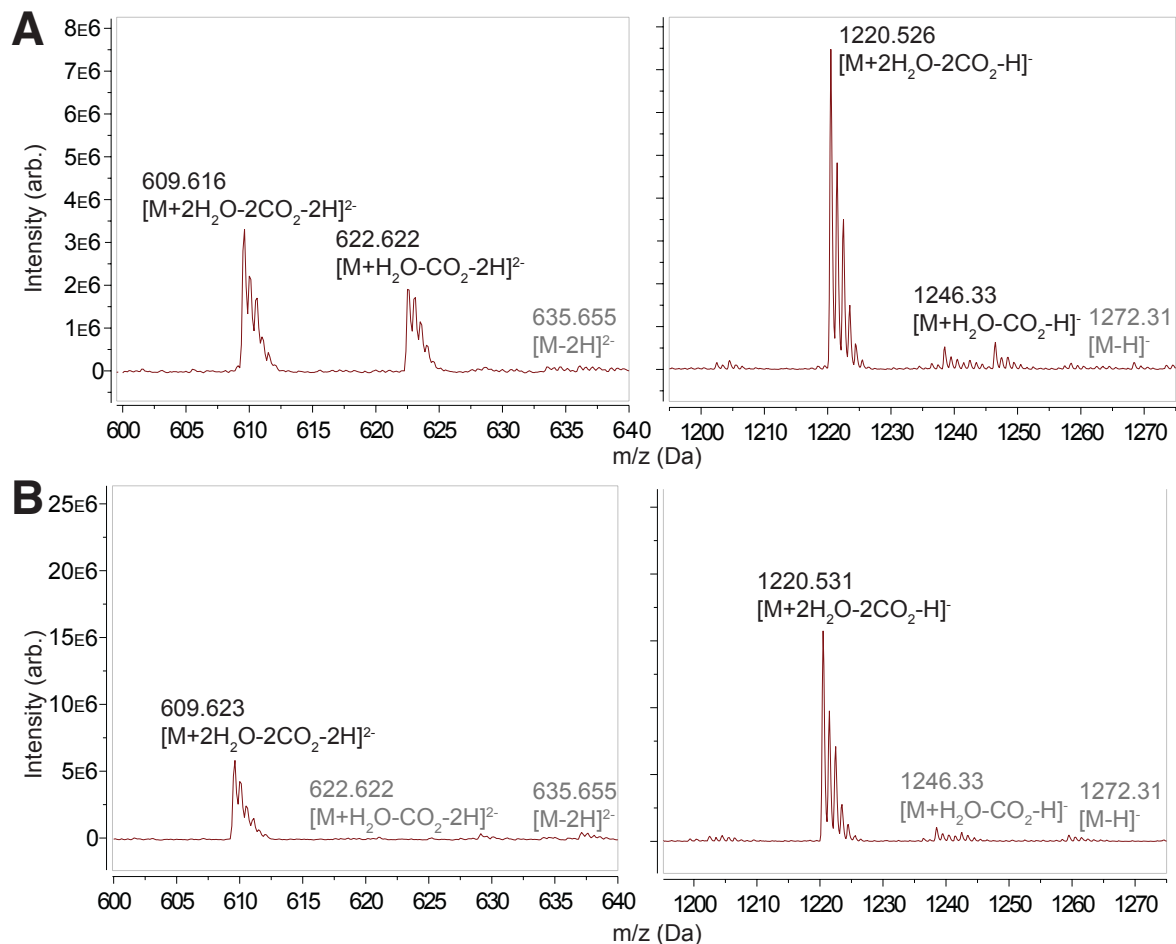

**Table S1.**  $^1\text{H}$ ,  $^{15}\text{N}$ , and  $^{13}\text{C}$  nuclear magnetic resonance assignments (ppm) for *Ms. sp. LW4* CuMbn, collected at 600 MHz in either 10%  $\text{D}_2\text{O}$ , 10 mM phosphate pH 6.5 or 100%  $\text{D}_2\text{O}$ , 10mM phosphate pH 6.5 at 25°C. Chemical shifts from 10%  $\text{D}_2\text{O}$  experiments indicated first, 100%  $\text{D}_2\text{O}$  values in parentheses. “N.D.” means “not detected” and “---“ means no signal expected for a given experiment.

| Residue          | Position                        | $^1\text{H}$            | $^{15}\text{N}$ | $^{13}\text{C}$ |
|------------------|---------------------------------|-------------------------|-----------------|-----------------|
| Met <sub>1</sub> | C <sub>α</sub> O                | ---                     | ---             | N.D.            |
|                  | C <sub>β</sub> /2H <sub>β</sub> | 2.22 (2.22)             | ---             | 27.96 (26.96)   |
|                  | C <sub>γ</sub> /2H <sub>γ</sub> | 1.96 (1.99)             | ---             | 37.43 (36.62)   |
|                  | C <sub>ε</sub> /2H <sub>ε</sub> | 1.78 (1.77)             | ---             | 15.12 (15.12)   |
| Oxa <sub>A</sub> | C <sub>2</sub>                  | ---                     | ---             | N.D.            |
|                  | N <sub>3</sub>                  | ---                     | N.D.            | ---             |
|                  | C <sub>4</sub>                  | ---                     | ---             | 112.51          |
|                  | C <sub>5</sub> (O)              | ---                     | ---             | N.D.            |
|                  | C <sub>6</sub> (S)              | ---                     | ---             | (185.26)        |
| Ala <sub>3</sub> | HN                              | 8.65                    | 134.68          | ---             |
|                  | C <sub>α</sub> /H <sub>α</sub>  | 4.53 (4.51)             | ---             | 55.28 (55.46)   |
|                  | C <sub>β</sub> /3H <sub>β</sub> | 1.52 (1.49)             | ---             | 16.32 (16.35)   |
|                  | CO                              | ---                     | ---             | 173.92 (173.77) |
| Cys <sub>4</sub> | HN                              | 7.86                    | 115.1           | ---             |
|                  | C <sub>α</sub> /H <sub>α</sub>  | 4.47(4.48)              | ---             | 57.12 (57.00)   |
|                  | C <sub>β</sub> /2H <sub>β</sub> | 2.96, 3.13 (3.00, 3.15) | ---             | 35.12 (35.26)   |
|                  | CO                              | ---                     | ---             | 171.32 (171.36) |
| Asn <sub>5</sub> | HN                              | 8.12                    | 124.91          | ---             |
|                  | C <sub>α</sub> /H <sub>α</sub>  | 4.84 (4.84)             | ---             | 48.56 (48.76)   |
|                  | C <sub>β</sub> /2H <sub>β</sub> | 2.46, 2.96 (2.48, 2.98) | ---             | 36.72 (36.62)   |
|                  | C <sub>γ</sub> O                | ---                     | ---             | 175.70 (175.83) |
|                  | N <sub>ε</sub> /2H <sub>ε</sub> | 6.36, 6.61              | 111.96          | ---             |
|                  | CO                              | ---                     | ---             | 166.37 (166.59) |
| Pro <sub>6</sub> | N                               | ---                     | N.D.            | ---             |
|                  | C <sub>α</sub> /H <sub>α</sub>  | 4.09 (4.11)             | ---             | 60.10 (59.93)   |
|                  | C <sub>β</sub> /2H <sub>β</sub> | 2.23, 1.86 (2.25, 1.86) | ---             | 27.02 (27.94)   |
|                  | C <sub>γ</sub> /2H <sub>γ</sub> | 1.85, 1.93 (1.88, 1.93) | ---             | 24.43 (24.55)   |
|                  | C <sub>δ</sub> /2H <sub>δ</sub> | 3.45 (3.46)             | ---             | 46.79 (46.88)   |
|                  | CO                              | ---                     | ---             | 171.14 (171.36) |

|                   |                                  |                         |        |                 |
|-------------------|----------------------------------|-------------------------|--------|-----------------|
| Pro <sub>7</sub>  | N                                | ---                     | N.D.   | ---             |
|                   | C <sub>α</sub> /H <sub>α</sub>   | 4.33 (4.37)             | ---    | (56.97)         |
|                   | C <sub>β</sub> /2H <sub>β</sub>  | 2.32, 2.03 (2.33, 2.05) | ---    | 31.93 (32.06)   |
|                   | C <sub>γ</sub> /2H <sub>γ</sub>  | 1.92, 1.89 (1.91)       | ---    | (21.85))        |
|                   | C <sub>δ</sub> /2H <sub>δ</sub>  | 3.58, 3.33              | ---    | 48.11 (47.72)   |
|                   | CO                               | ---                     | ---    | 173.92 (170.61) |
| Trp <sub>8</sub>  | HN                               | 8.36                    | 124.91 | ---             |
|                   | C <sub>α</sub> /H <sub>α</sub>   | 5.57 (5.58)             | ---    | 50.040 (50.22)  |
|                   | C <sub>β</sub> /2H <sub>β</sub>  | 3.11, 3.22 (3.12, 3.23) | ---    | 27.46 (27.61)   |
|                   | C <sub>γ</sub>                   | ---                     | ---    | 108.98 (109.14) |
|                   | C <sub>δ1</sub> /H <sub>δ1</sub> | 7.00 (7.00)             | ---    | 124.58 (124.43) |
|                   | C <sub>δ2</sub>                  | ---                     | ---    | 125.95 (126.17) |
|                   | N <sub>ε1</sub> /H <sub>ε1</sub> | 9.87                    | 128.47 | ---             |
|                   | C <sub>ε</sub>                   | ---                     | ---    | 135.94 (136.22) |
|                   | C <sub>ε3</sub> /H <sub>ε3</sub> | 7.58 (7.59)             | ---    | 118.90 (119.09) |
|                   | C <sub>ζ2</sub> /H <sub>ζ2</sub> | 7.04 (7.05)             | ---    | 111.35 (111.38) |
|                   | C <sub>ζ3</sub> /H <sub>ζ3</sub> | 6.50 (6.51)             | ---    | 117.92 (117.98) |
|                   | C <sub>n2</sub> /H <sub>n2</sub> | 6.77 (6.77)             | ---    | 121.68 (121.70) |
| Oxa <sub>B</sub>  | C <sub>2</sub>                   | ---                     | ---    | 147.00 (147.07) |
|                   | N <sub>3</sub>                   | ---                     | N.D.   | ---             |
|                   | C <sub>4</sub>                   | ---                     | ---    | 107.91          |
|                   | C <sub>5</sub> (O)               | ---                     | ---    | N.D.            |
|                   | C <sub>6</sub> (S)               | ---                     | ---    | 183.78 (184.00) |
| Gly <sub>10</sub> | HN                               | 8.11                    | 114.68 | ---             |
|                   | C <sub>α</sub> /2H <sub>α</sub>  | 4.00, 4.05 (4.01, 4.09) | ---    | 48.50 (48.26)   |
|                   | CO                               | ---                     | ---    | 171.28 (171.36) |
| Thr <sub>11</sub> | HN                               | 7.89                    | 117.30 | ---             |
|                   | C <sub>α</sub> /H <sub>α</sub>   | 4.10 (4.13)             | ---    | 58.28 (58.30)   |
|                   | C <sub>β</sub> /H <sub>β</sub>   | 3.97 (3.99)             | ---    | 67.38 (67.28)   |
|                   | C <sub>γ</sub> /3H <sub>γ</sub>  | .95                     | ---    | 18.19 (18.54)   |
|                   | CO                               | ---                     | ---    | 171.03 (171.00) |
| Cys <sub>12</sub> | HN                               | 7.69                    | 127.53 | ---             |
|                   | C <sub>α</sub> /H <sub>α</sub>   | 4.35 (4.41)             | ---    | 51.99 (51.70)   |
|                   | C <sub>β</sub> /2H <sub>β</sub>  | 1.96, 3.01 (2.07, 3.03) | ---    | 37.43 (37.62)   |
|                   | CO                               | ---                     | ---    | 170.76 (175.83) |

# NMR Data

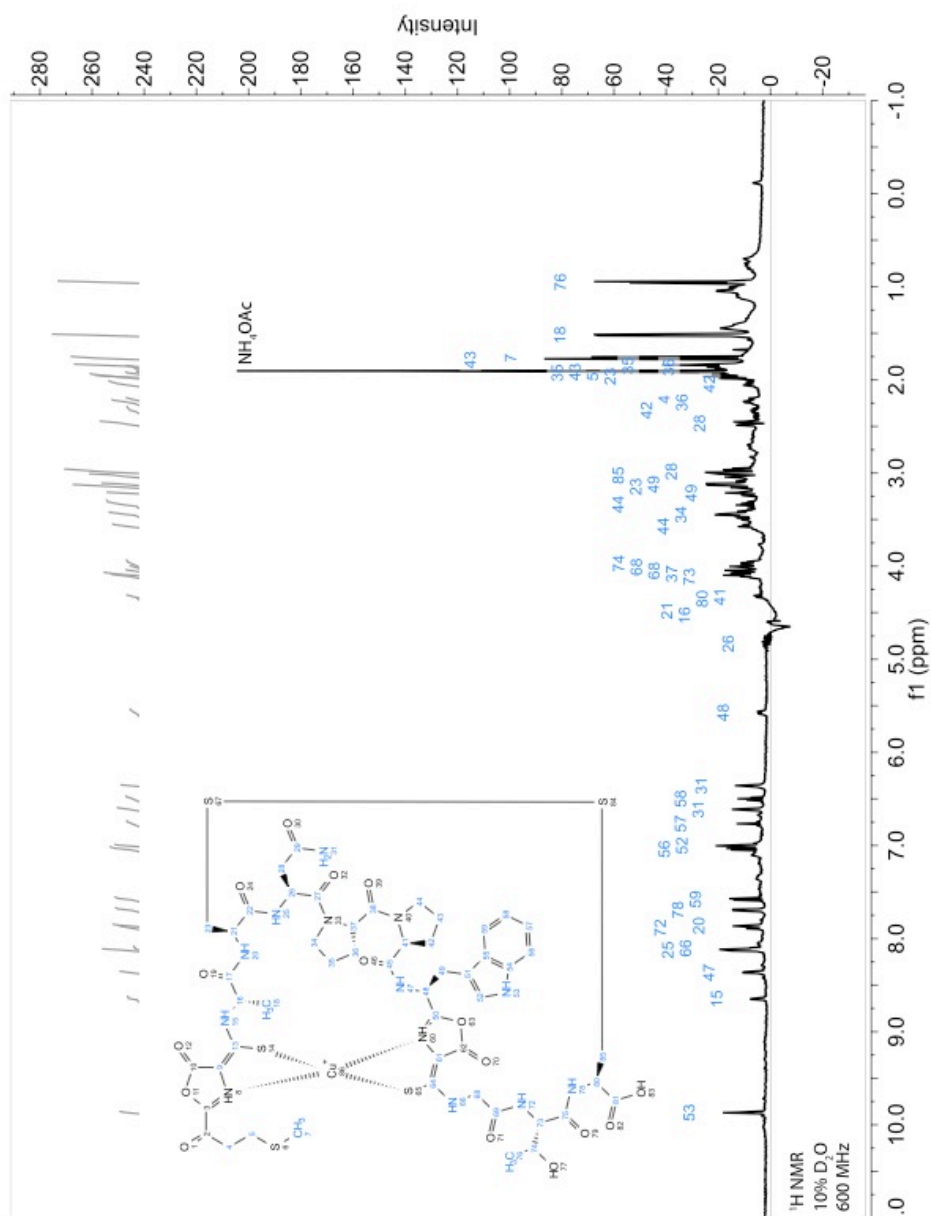



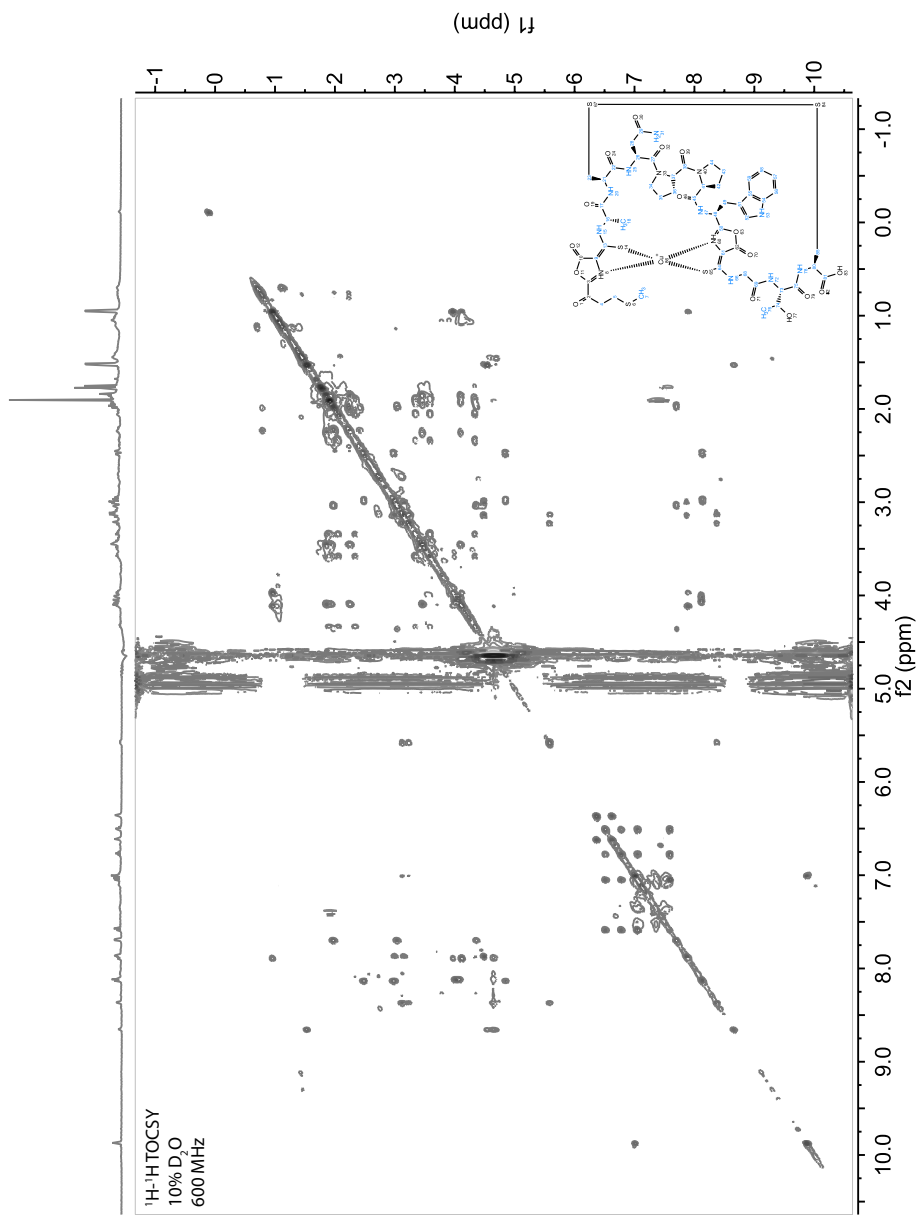

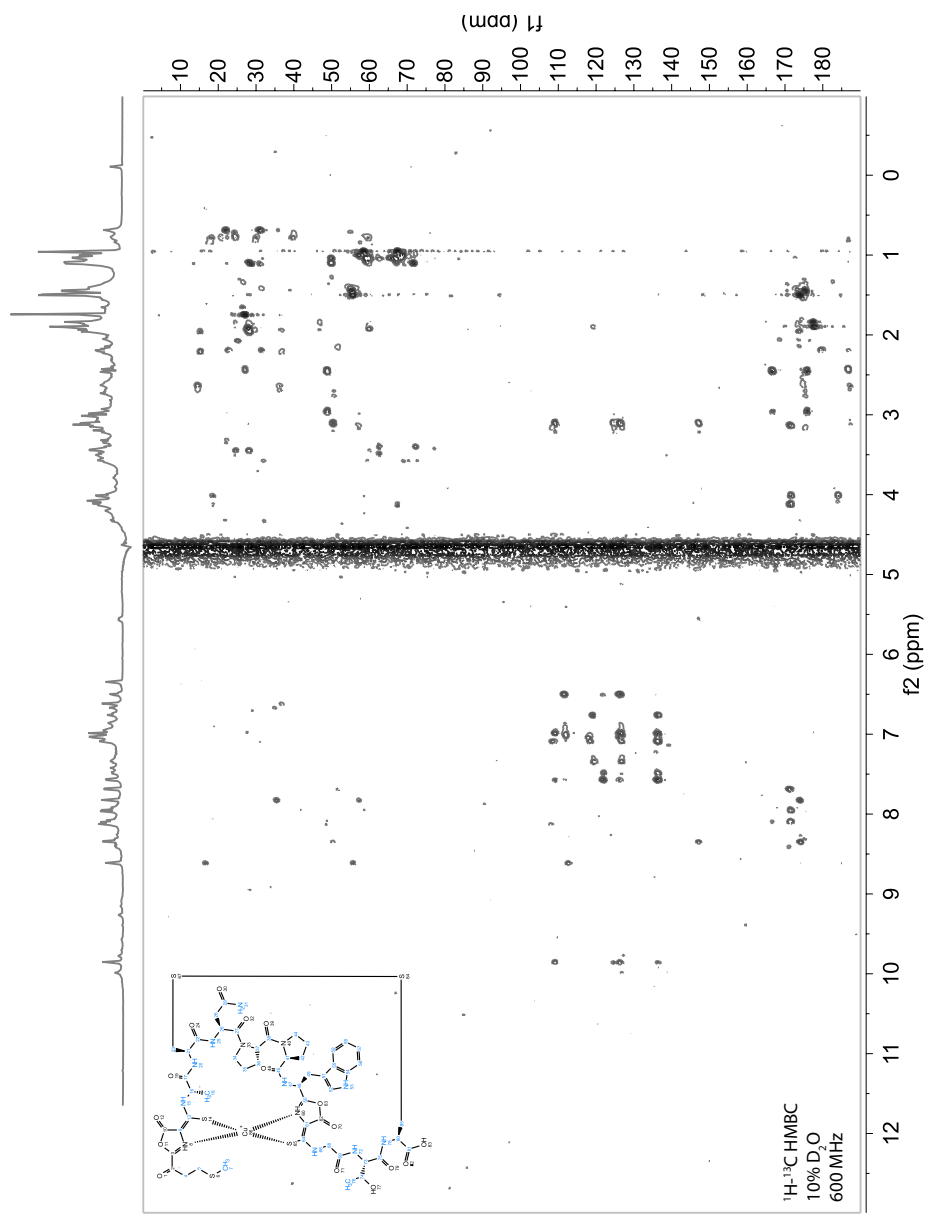

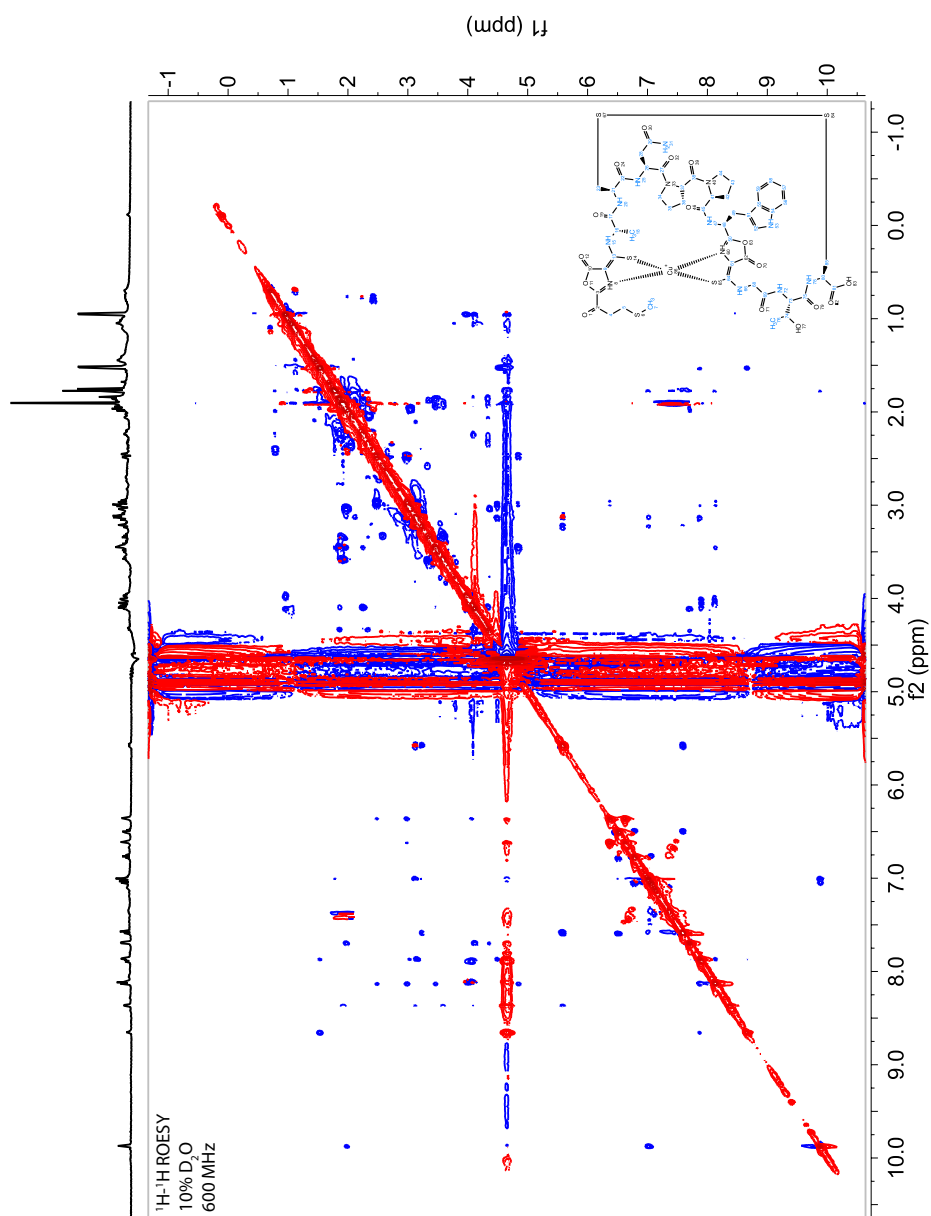

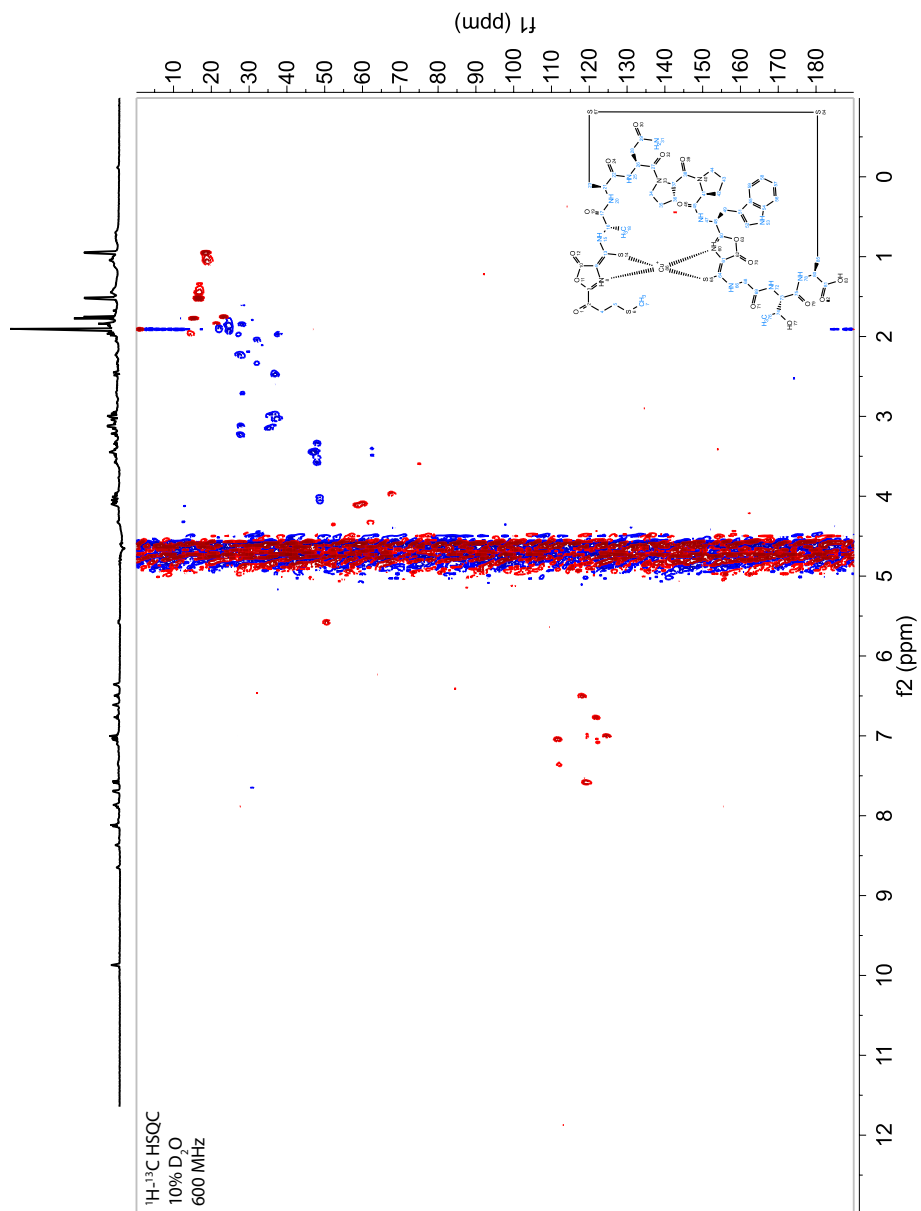

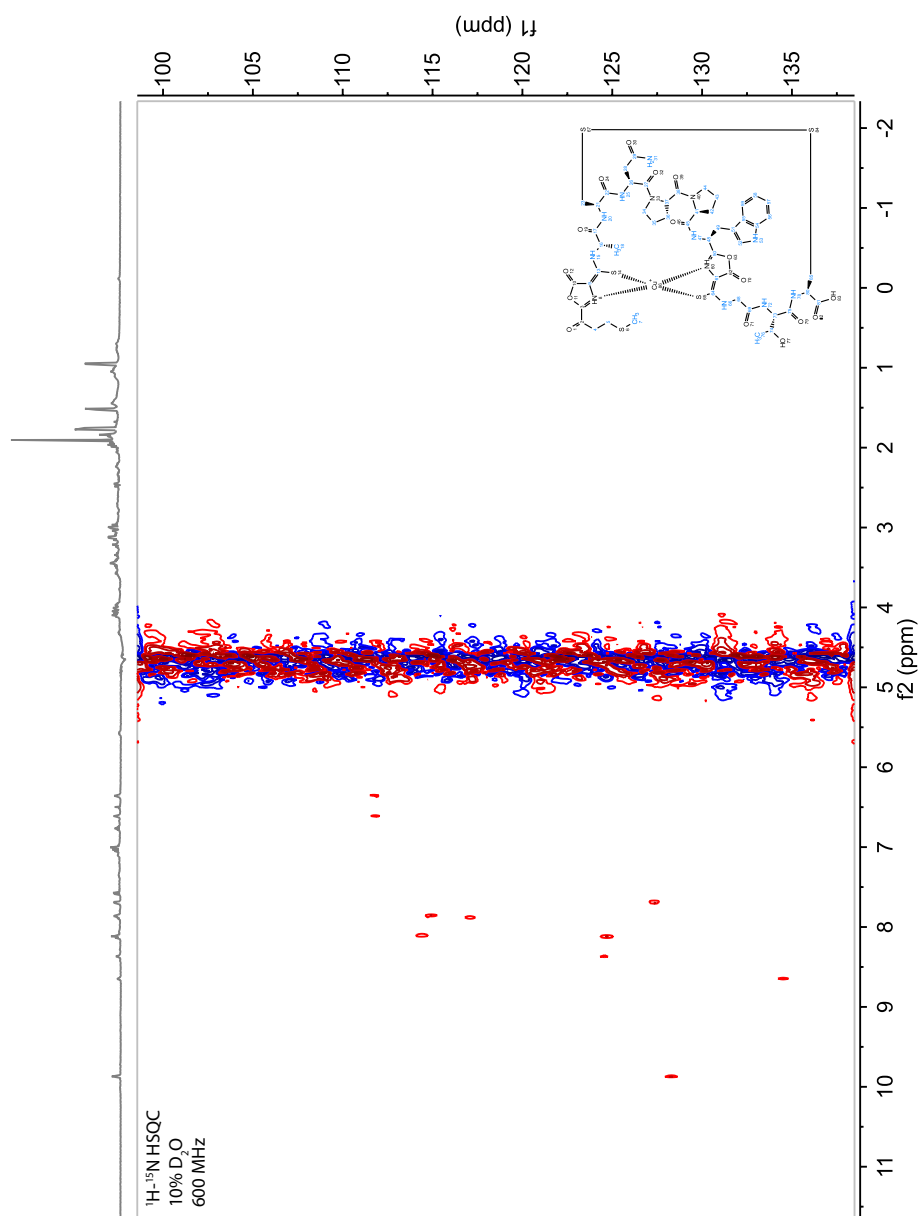

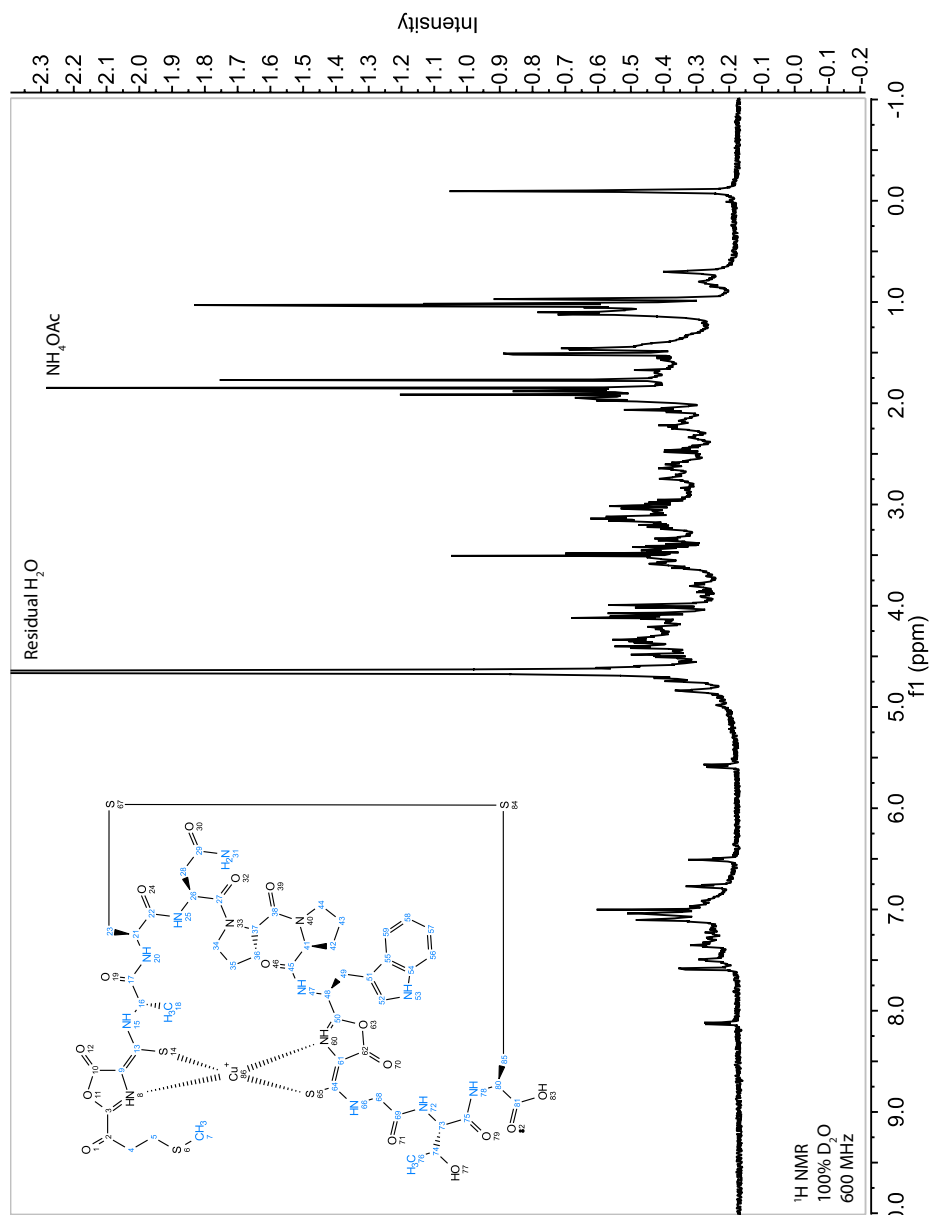

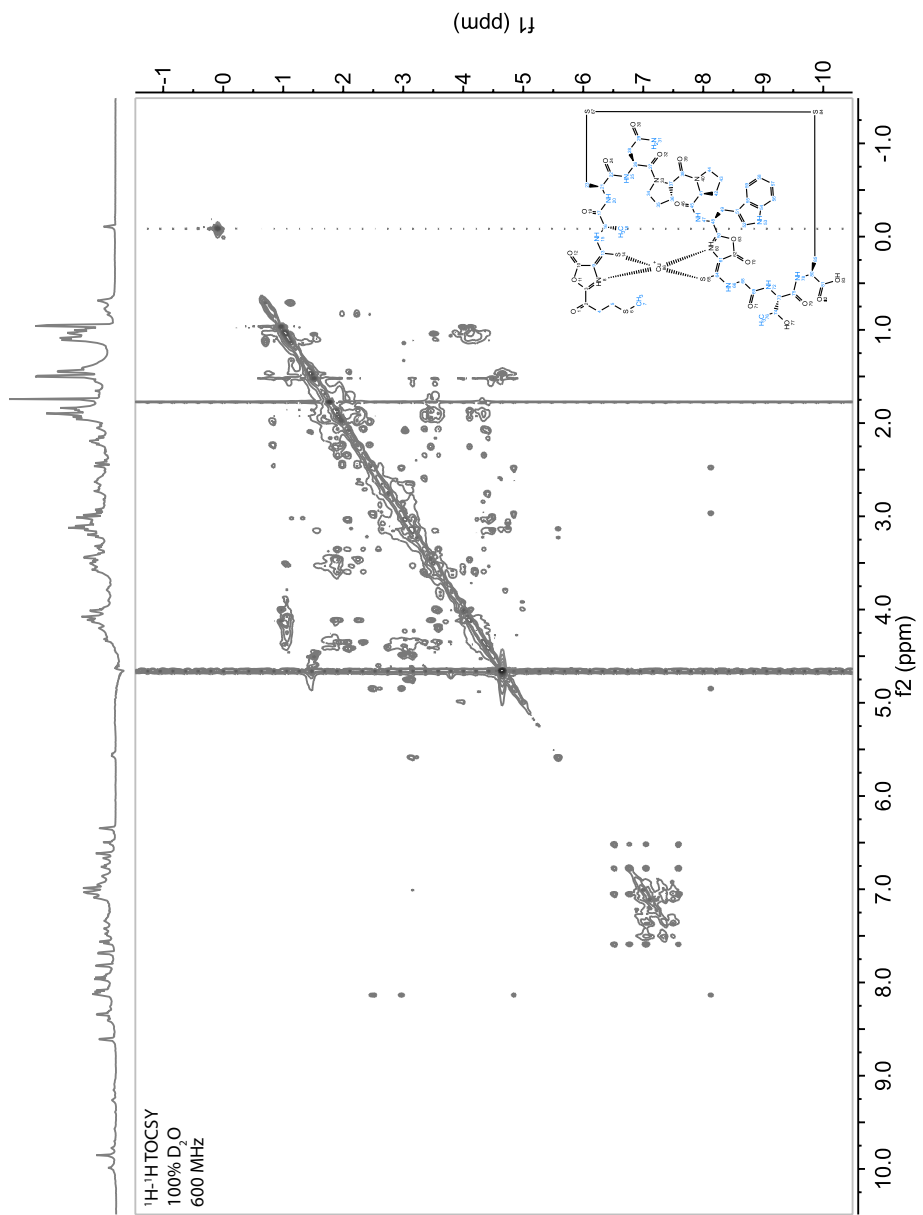

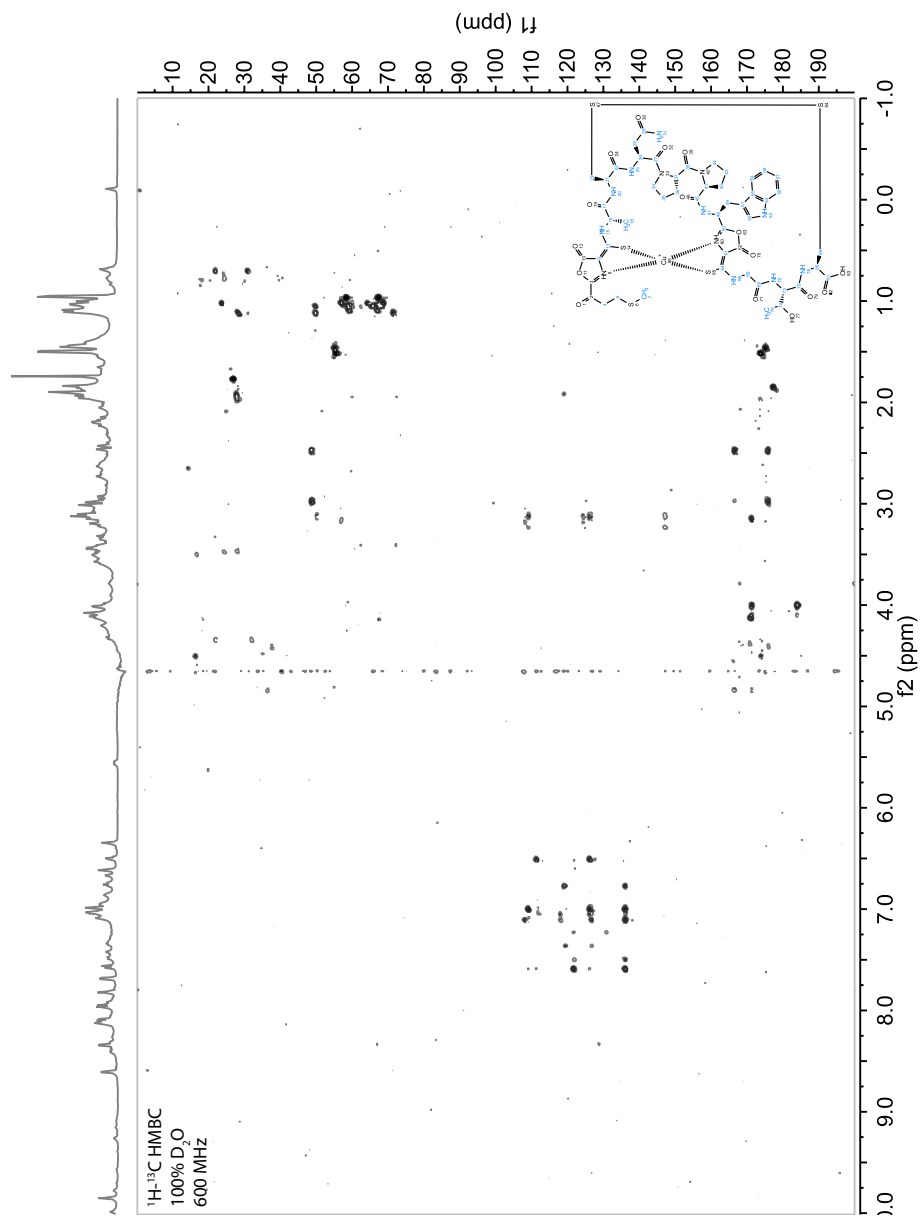



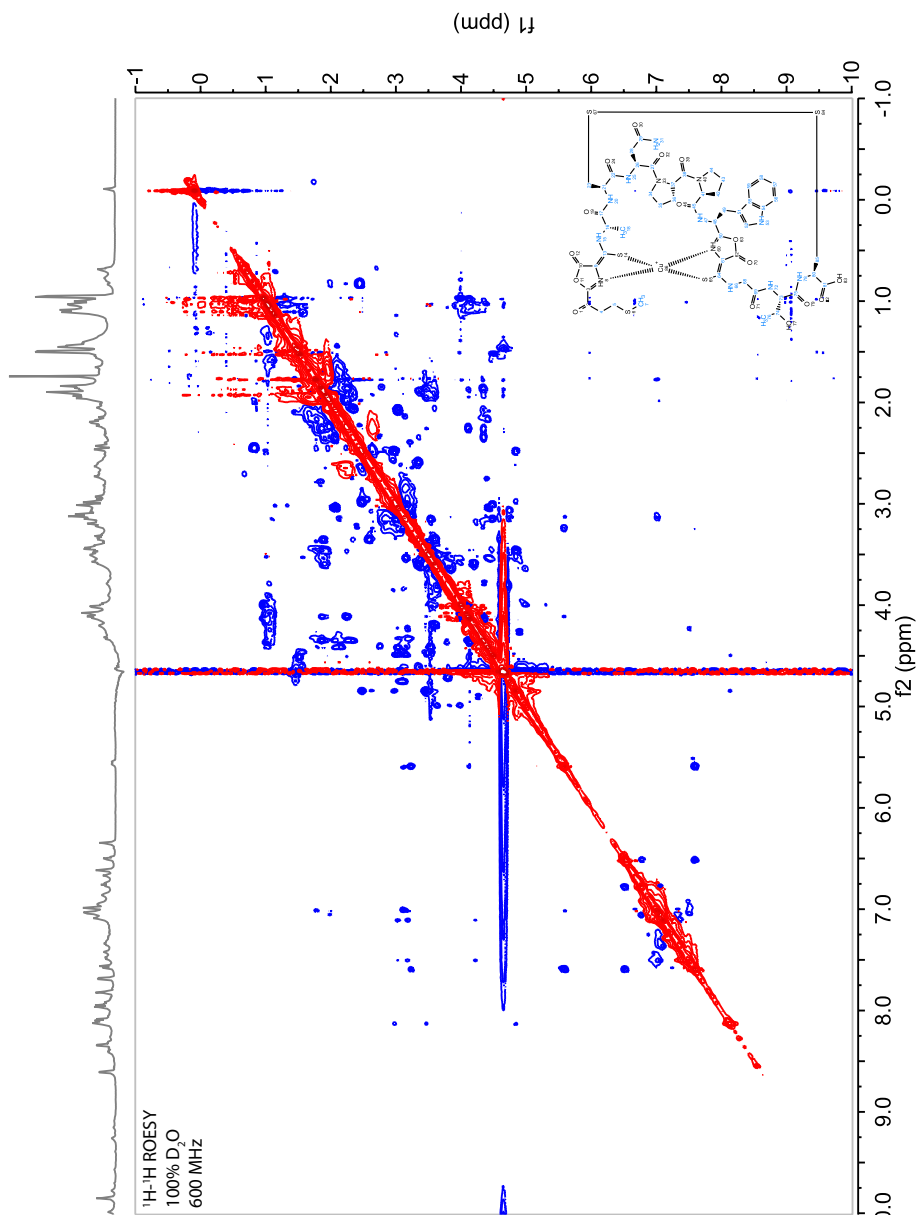

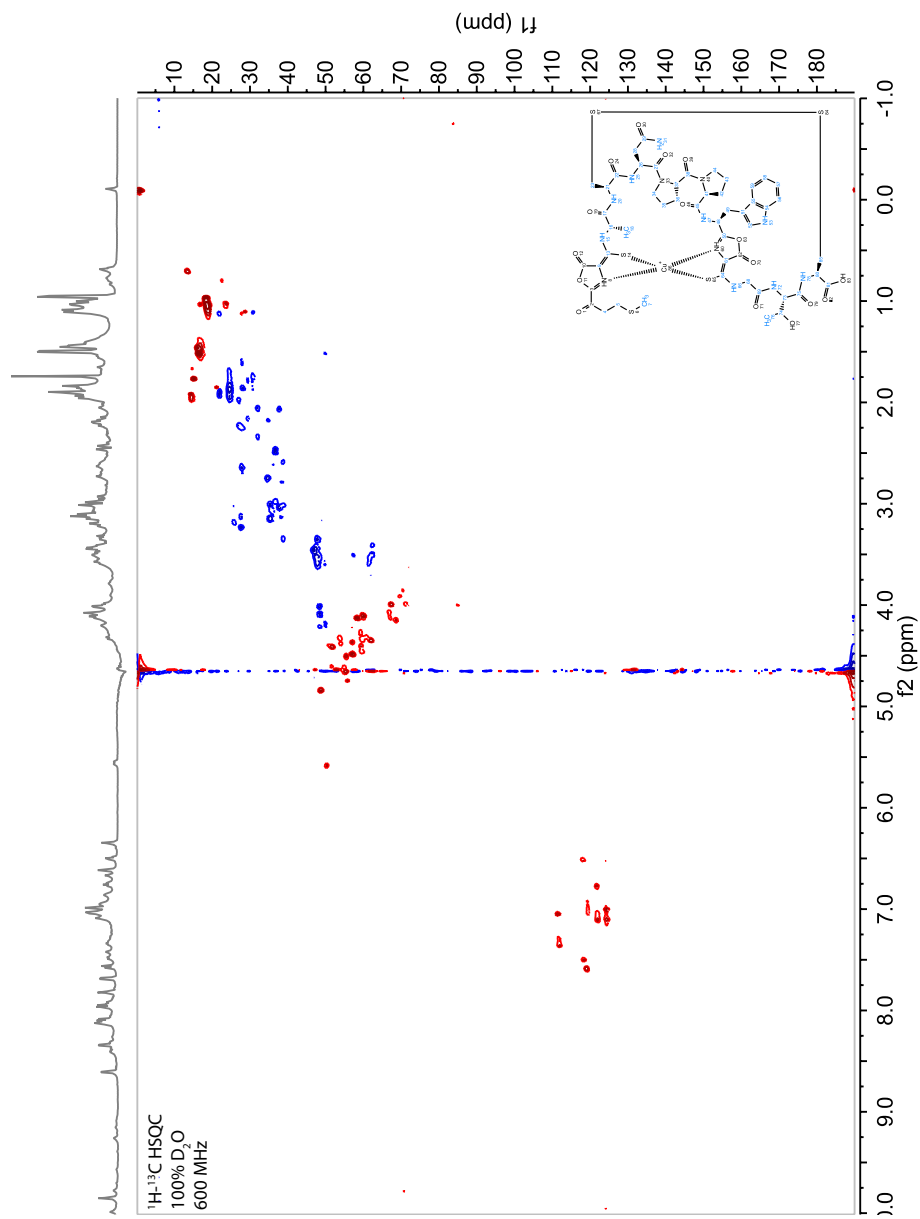

## Supplemental References

- (1) Hakemian, A. S.; Tinberg, C. E.; Kondapalli, K. C.; Telser, J.; Hoffman, B. M.; Stemmler, T. L.; Rosenzweig, A. C. *J. Am. Chem. Soc.* **2005**, *127*, 17142.
